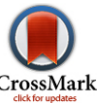

## Correction

# Correction: Lactate and the Lactate-to-Pyruvate Molar Ratio Cannot Be Used as Independent Biomarkers for Monitoring Brain Energetic Metabolism: A Microdialysis Study in Patients with Traumatic Brain Injuries

The *PLOS ONE* Staff

For the sake of clarity, the authors have provided the tables of their article in the format given prior to our typesetting process. Please download this supporting Table S1 to view the tables of this manuscript in the layout the authors intended.

## Supporting Information

**Table S1.** Original format for Table 1, Table 2, and Table 3 of “Lactate and the Lactate-to-Pyruvate Molar Ratio Cannot Be Used as Independent Biomarkers for Monitoring Brain Energetic Metabolism: A Microdialysis Study in Patients with Traumatic Brain Injuries” (PDF)

## Reference

1. Sahuquillo J, Merino M-A, Sánchez-Guerrero A, Arikian F, Vidal-Jorge M, et al. (2014) Lactate and the Lactate-to-Pyruvate Molar Ratio Cannot Be Used as Independent Biomarkers for Monitoring Brain Energetic Metabolism: A Microdialysis Study in Patients with Traumatic Brain Injuries. *PLoS ONE* 9(7): e102540. doi:10.1371/journal.pone.0102540

**Citation:** The *PLOS ONE* Staff (2014) Correction: Lactate and the Lactate-to-Pyruvate Molar Ratio Cannot Be Used as Independent Biomarkers for Monitoring Brain Energetic Metabolism: A Microdialysis Study in Patients with Traumatic Brain Injuries. *PLoS ONE* 9(10): e111821. doi:10.1371/journal.pone.0111821

**Published:** October 22, 2014

**Copyright:** © 2014 The *PLOS ONE* Staff. This is an open-access article distributed under the terms of the Creative Commons Attribution License, which permits unrestricted use, distribution, and reproduction in any medium, provided the original author and source are credited.
